# Supplementary material
Source: Springer Nature journal article supplement (https://www.springermedizin.de/resource/supplementary/12935_2011_324_MOESM4_ESM.pdf/9540304)

A

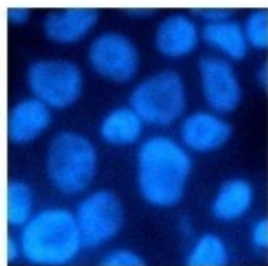

0.1nM R1881  
w/o TRAIL (24h)

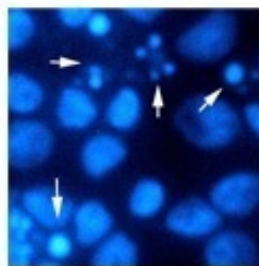

0.1nM R1881  
TRAIL 100ng/ml (24h)

B

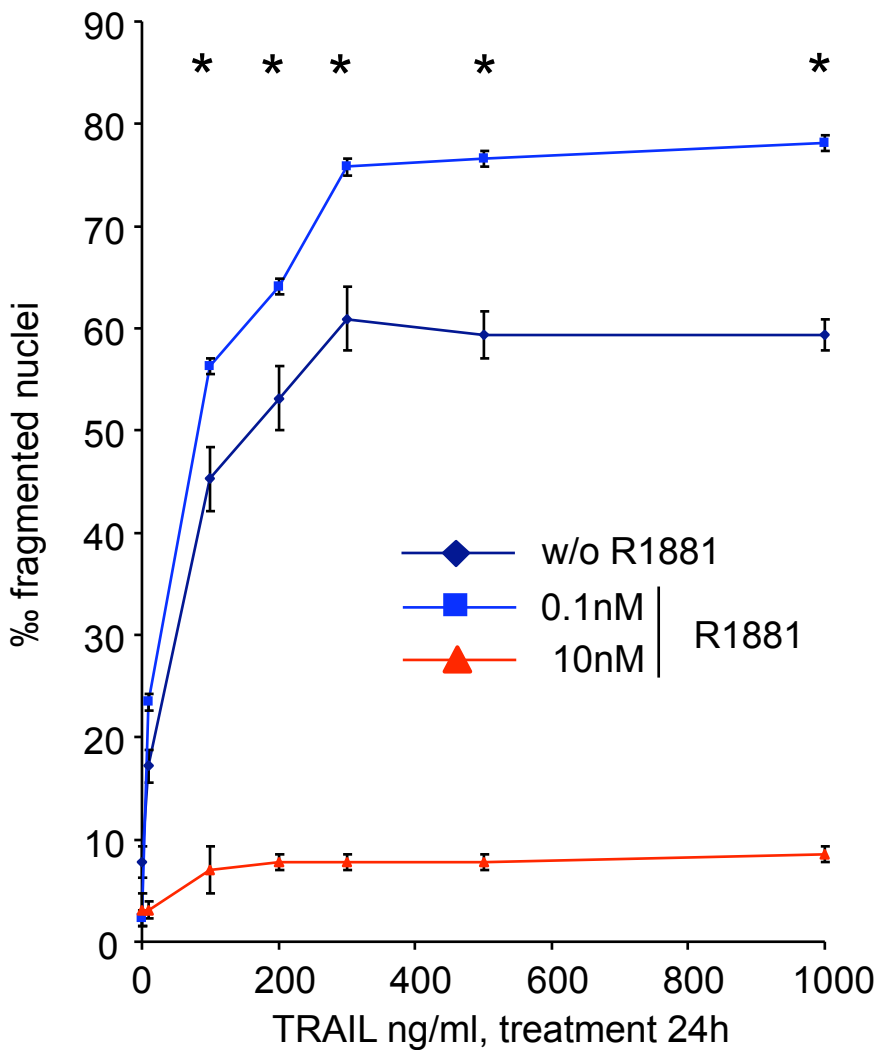

Supplement: MOESM4 [file 9540304]
